# Supplementary material for: A Meta-analysis of MBL2 Polymorphisms and Tuberculosis Risk
Source: PubMed Central journal article supplement (PMC5120291; doi:10.1038/srep35728), 2016-11-23
Supplement: srep35728-s1.pdf [file srep35728-s1.pdf]

## Supplementary Information

### **A Meta-analysis of *MBL2* Polymorphisms and Tuberculosis Risk**

*Authors' names in order of their authorship*

Mohammed Y. Areeshi<sup>1#</sup>, Raju K. Mandal<sup>1#</sup>, Naseem Akhter<sup>2</sup>, Sajad A. Dar<sup>1,3</sup>, Arshad Jawed<sup>1</sup>,  
Mohd Wahid<sup>1,4</sup>, Harishankar Mahto<sup>5</sup>, Aditya K. Panda<sup>5</sup>, Mohtashim Lohani<sup>1,6</sup>,  
Shafiul Haque<sup>1,4✉</sup>

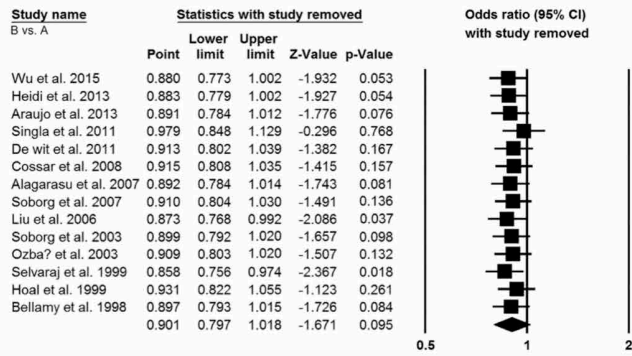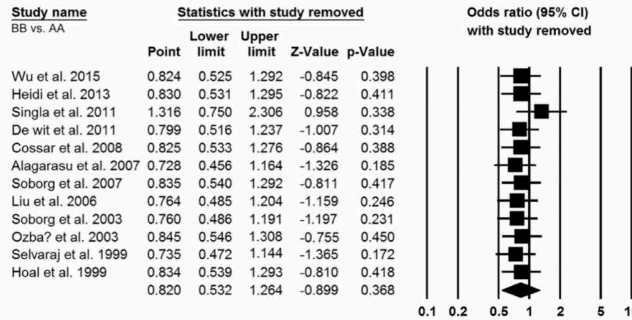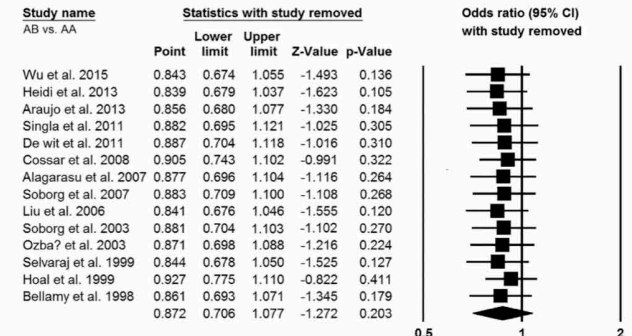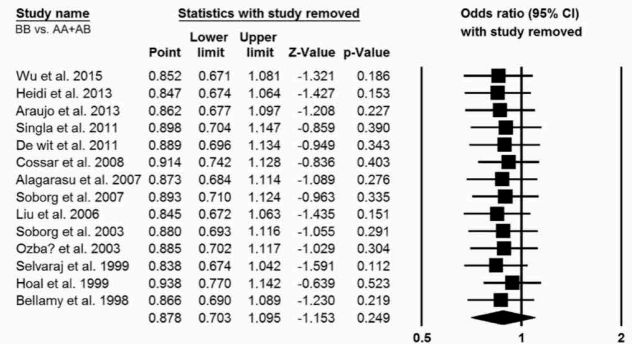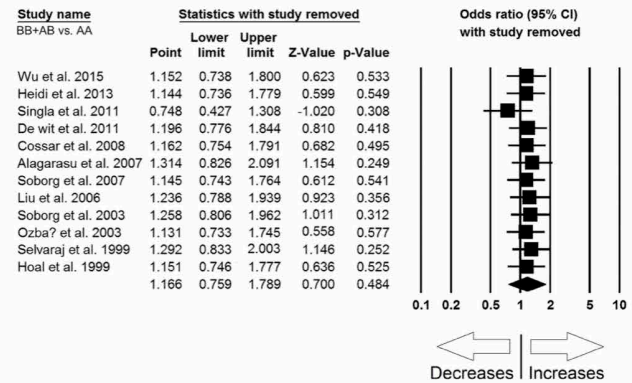

Figure S11. Sensitivity analysis of MBL2 rs1800450 (A>B) gene polymorphism and TB risk to evaluate the influence of each individual study on the pooled OR by deleting one single study each time for overall analysis (for all the genetic models). Black square represents the value of OR and the size of the square indicates the inverse proportion relative to its variance. Horizontal line is the 95% CI of OR.

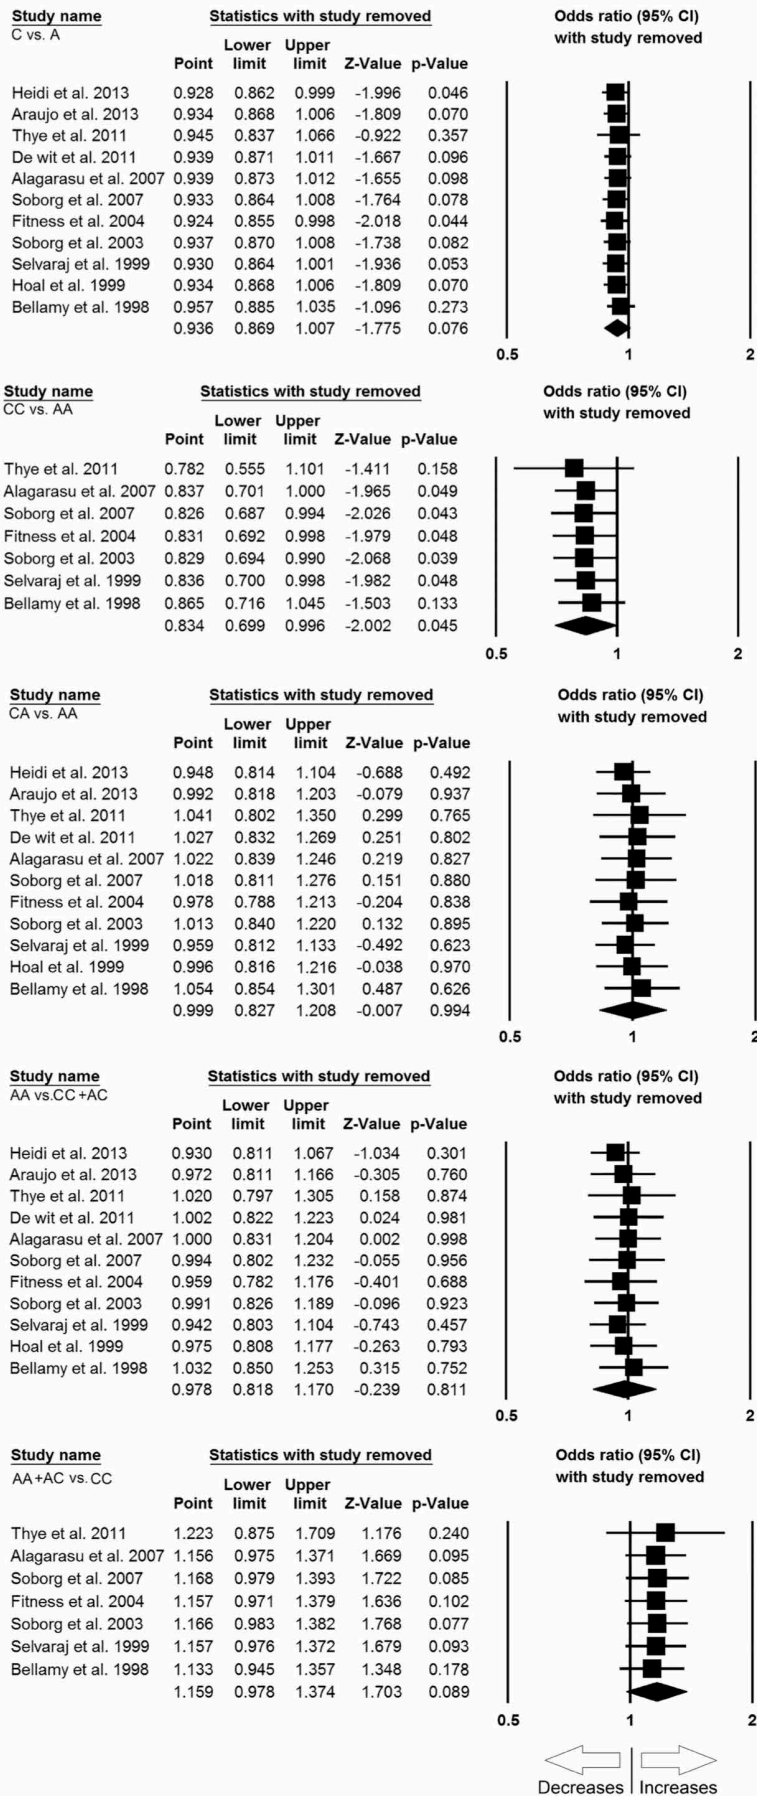

Figure SI2. Sensitivity analysis of MBL2 rs1800451 (A>C) gene polymorphism and TB risk to evaluate the influence of each individual study on the pooled OR by deleting one single study each time for overall analysis (for all the genetic models). Black square represents the value of OR and the size of the square indicates the inverse proportion relative to its variance. Horizontal line is the 95% CI of OR.

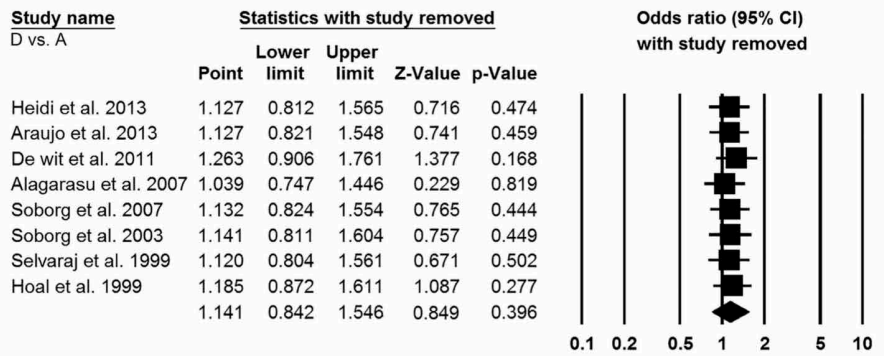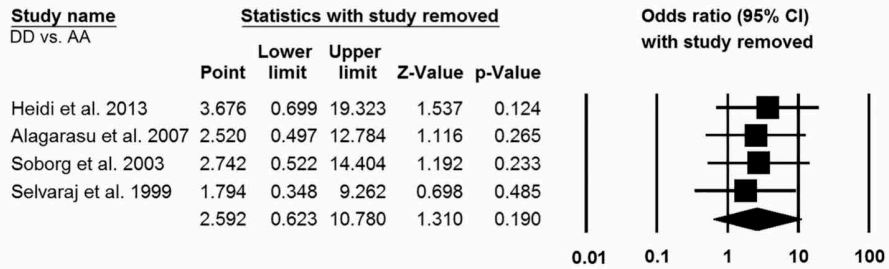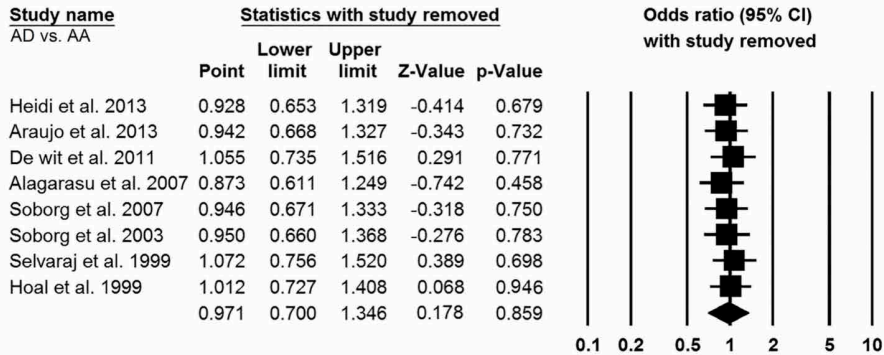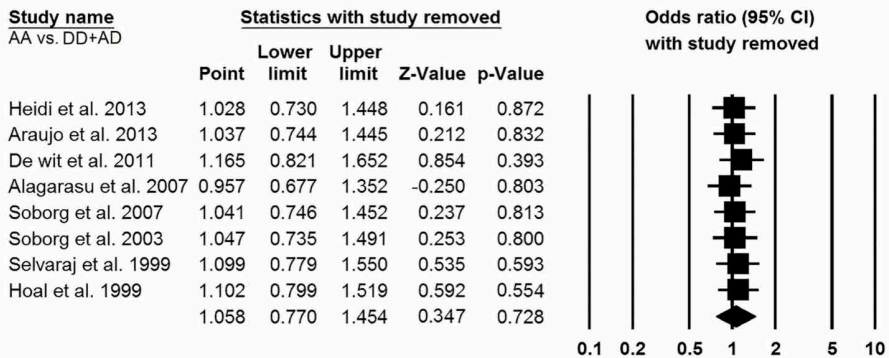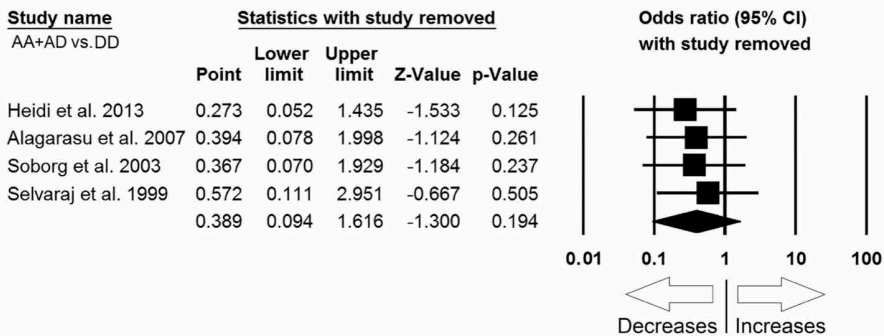

Figure SI3. Sensitivity analysis of rs5030737 (A>D) gene polymorphism and TB risk to evaluate the influence of each individual study on the pooled OR by deleting one single study each time for overall analysis (for all the genetic models). Black square represents the value of OR and the size of the square indicates the inverse proportion relative to its variance. Horizontal line is the 95% CI of OR.

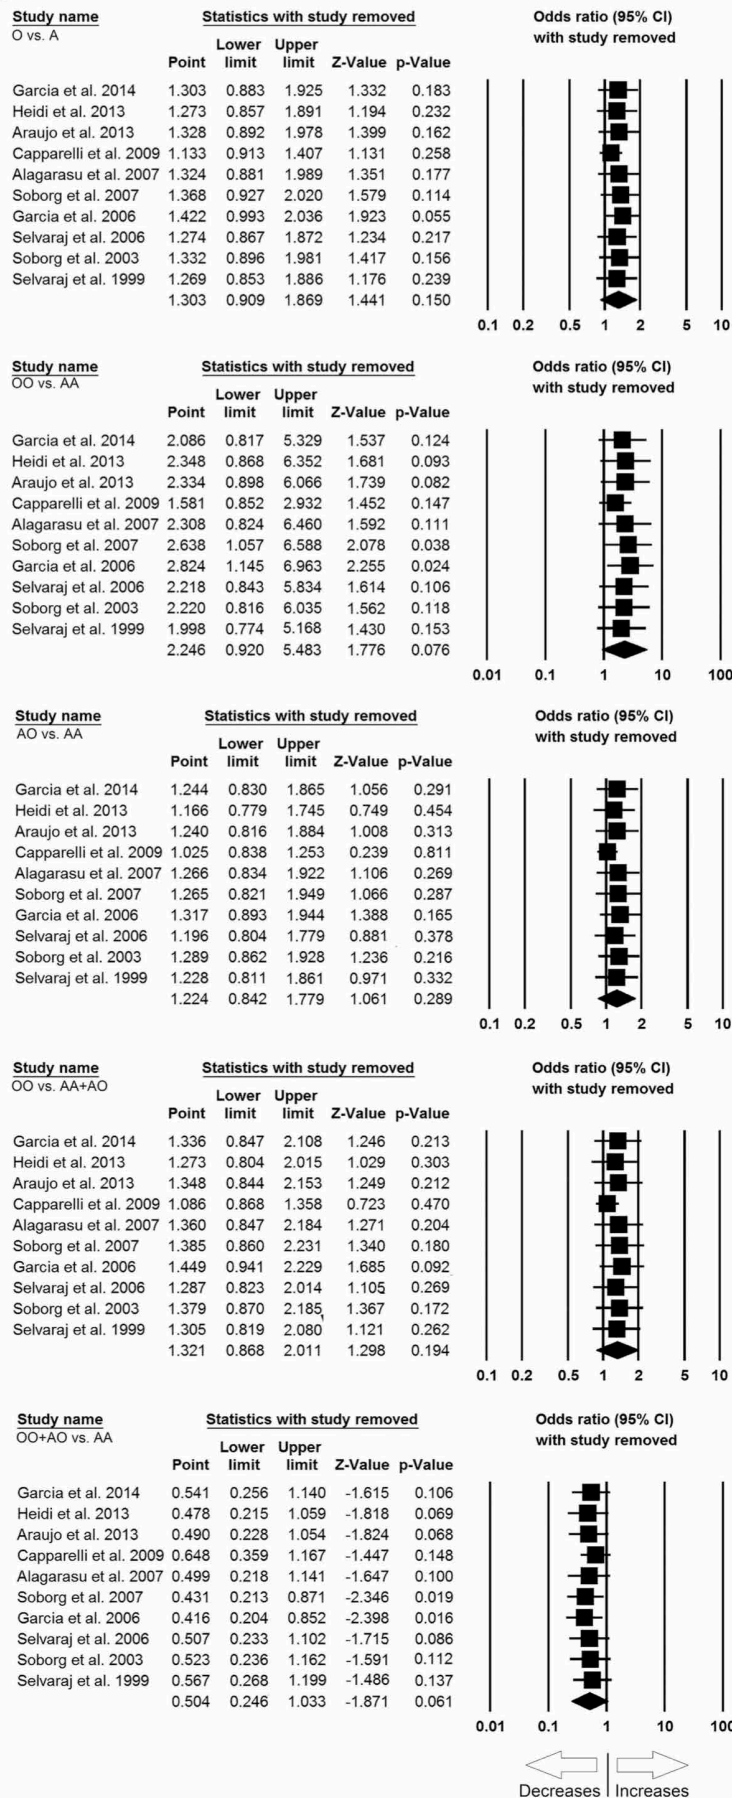

Figure SI4. Sensitivity analysis of MBL2 combined rs1800450, rs1800451, rs5030737 (A>O) exon 1 gene polymorphisms and TB risk to evaluate the influence of each individual study on the pooled OR by deleting one single study each time for overall analysis (for all the genetic models). Black square represents the value of OR and the size of the square indicates the inverse proportion relative to its variance. Horizontal line is the 95% CI of OR.

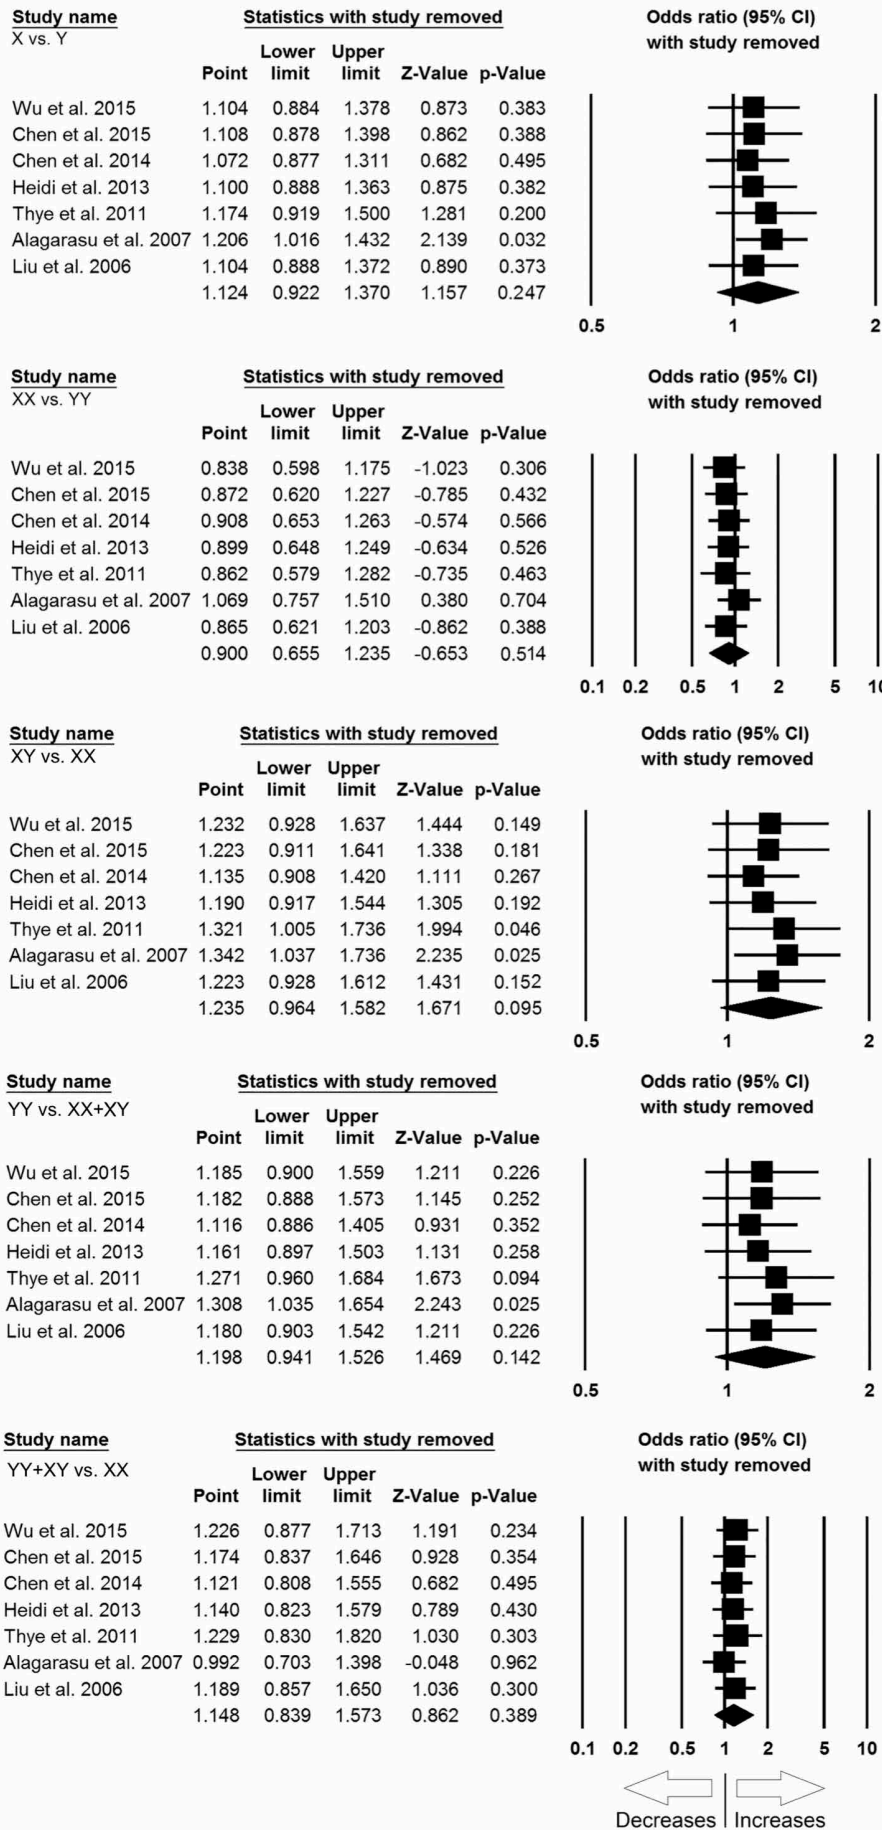

Figure SI5. Sensitivity analysis of MBL2 rs7096206 (Y>X) gene polymorphism and TB risk to evaluate the influence of each individual study on the pooled OR by deleting one single study each time for overall analysis (for all the genetic models). Black square represent the value of OR and the size of the square indicates the inverse proportion relative to its variance. Horizontal line is the 95% CI of OR.



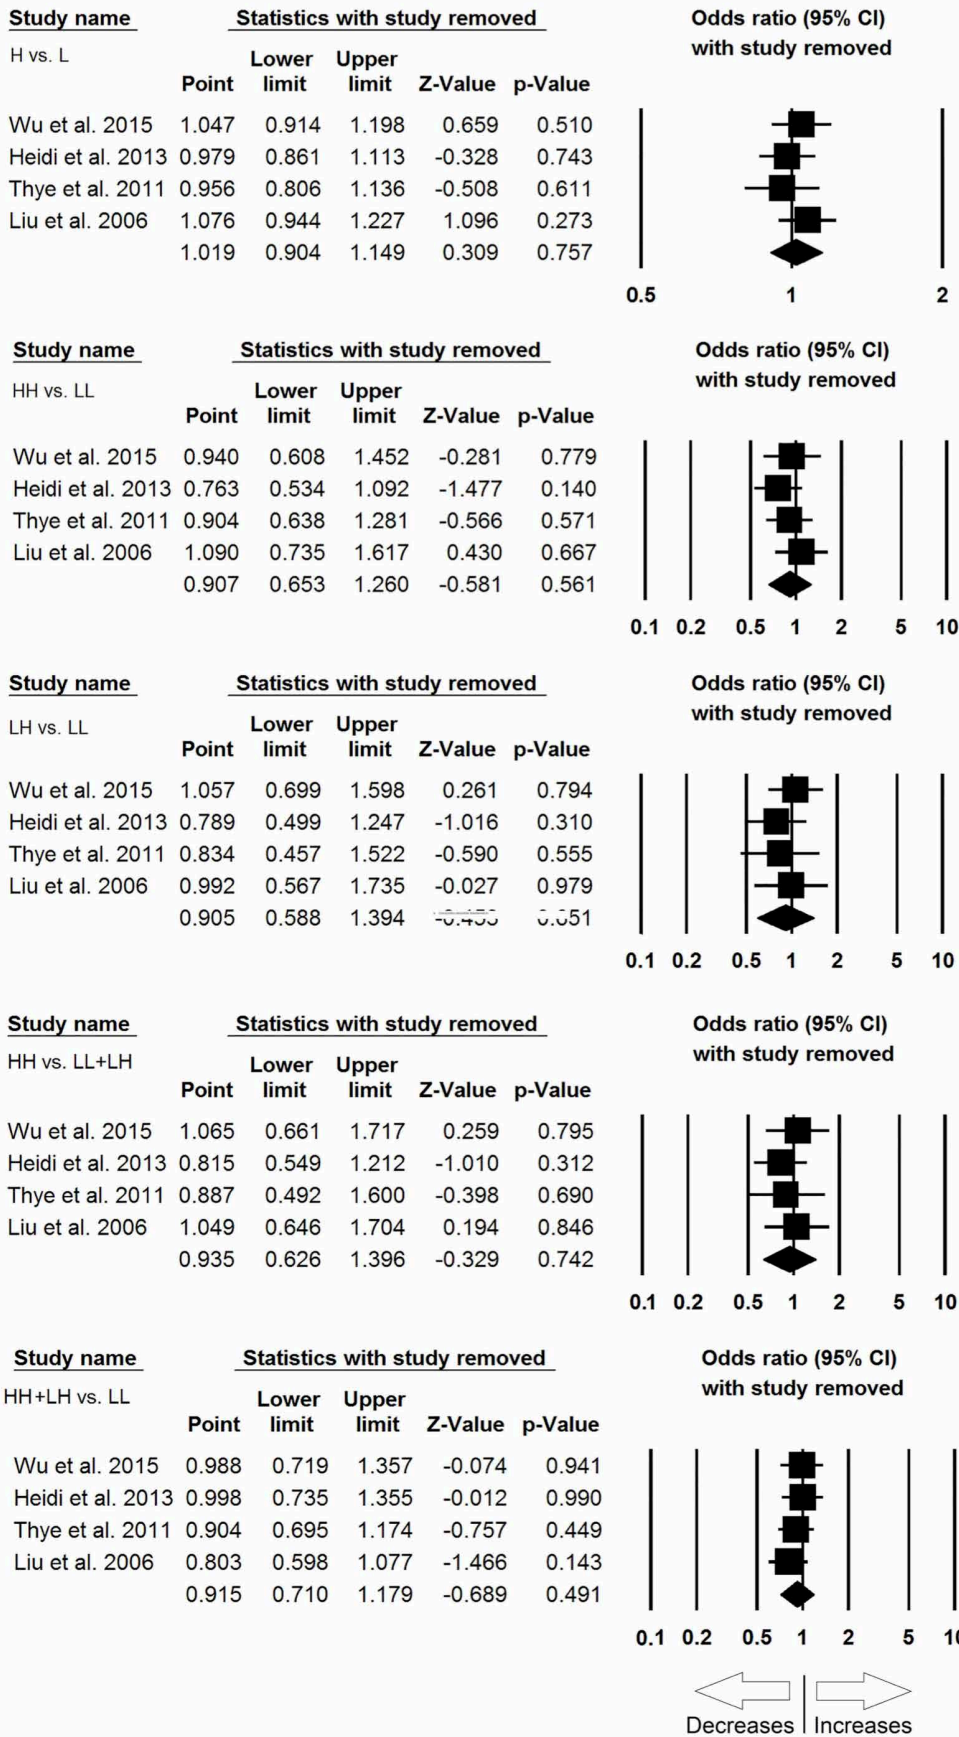

Figure SI6. Sensitivity analysis of MBL2 rs11003125 (H>L) gene polymorphism and TB risk to evaluate the influence of each individual study on the pooled OR by deleting one single study each time for overall analysis (for all the genetic models). Black square represents the value of OR and the size of the square indicates the inverse proportion relative to its variance. Horizontal line is the 95% CI of OR.

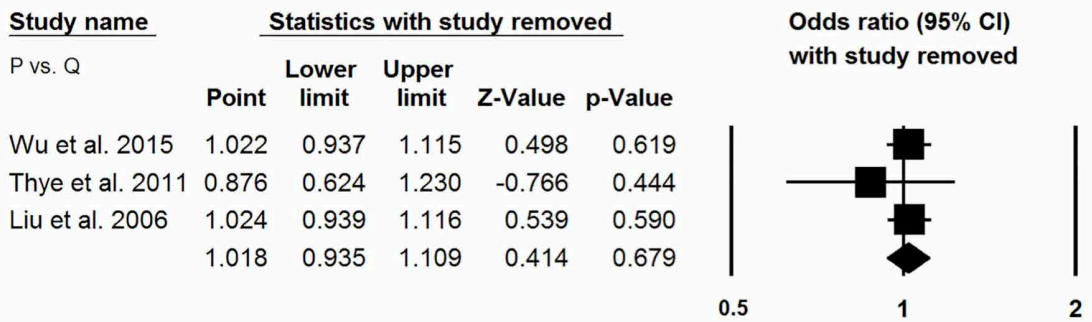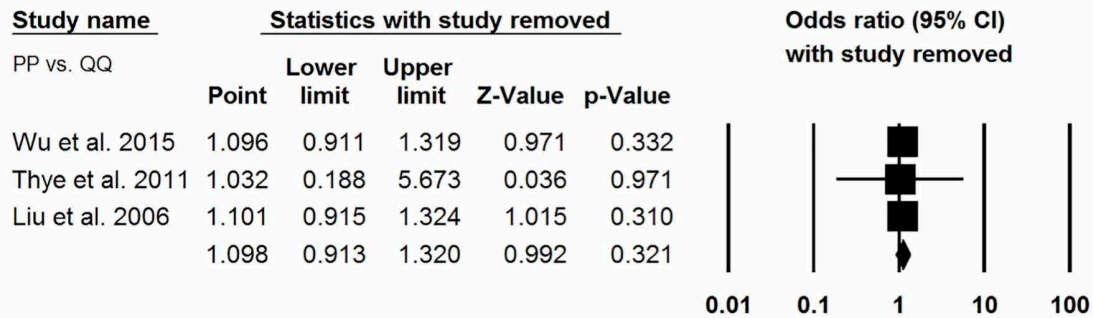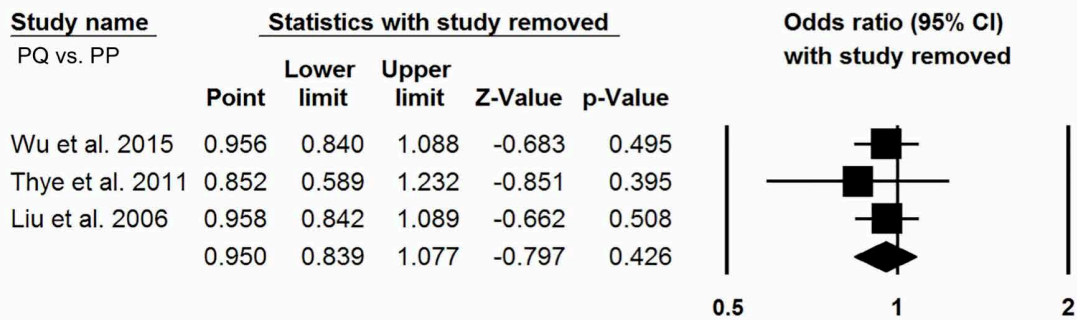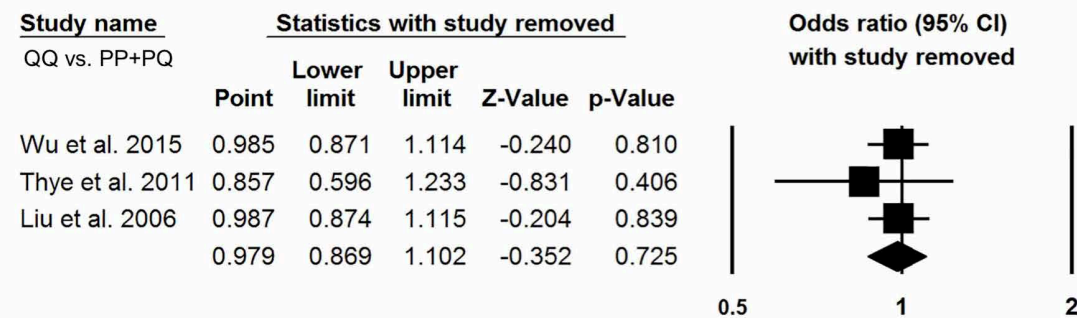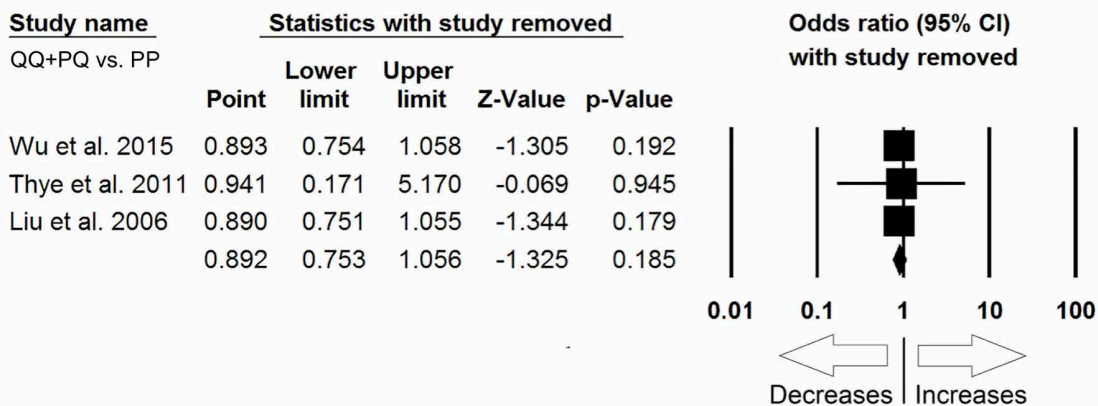

Figure SI7. Sensitivity analysis of rs7095891 (P>Q) gene polymorphism and TB risk to evaluate the influence of each individual study on the pooled OR by deleting one single study each time for overall analysis (for all the genetic models). Black square represents the value of OR and the size of the square indicates the inverse proportion relative to its variance. Horizontal line is the 95% CI of OR.



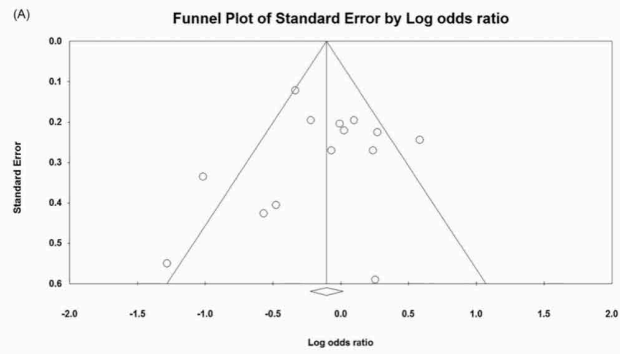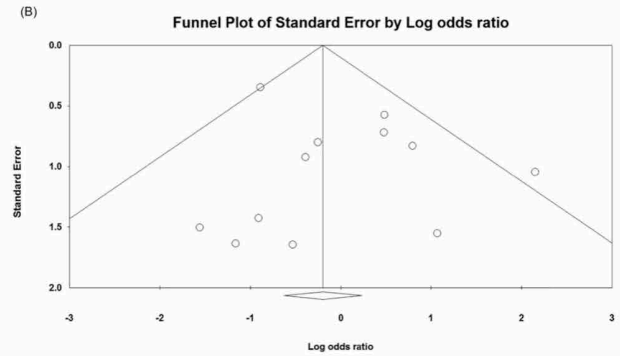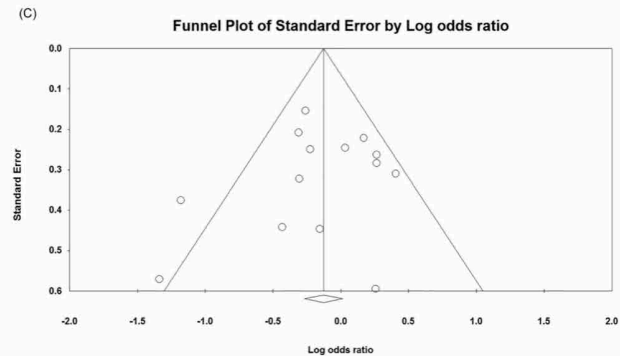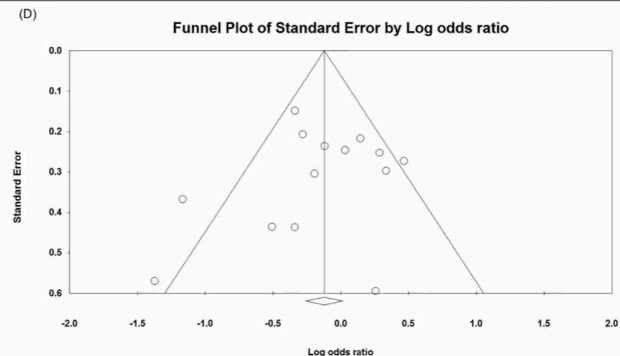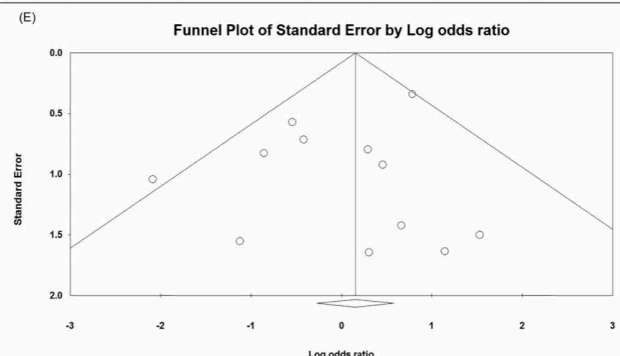

Figure S18. Assessment of publication bias shown with Funnel plots in studies assaying odds of TB associated with the MBL2 rs1800450 (A>B) gene polymorphism for overall analysis (odds ratio against standard error in different genetic models); (A) B vs. A; (B) BB vs. AA; (C) AB vs. AA; (D) BB vs. AA+AB; (E) BB+AB vs. AA

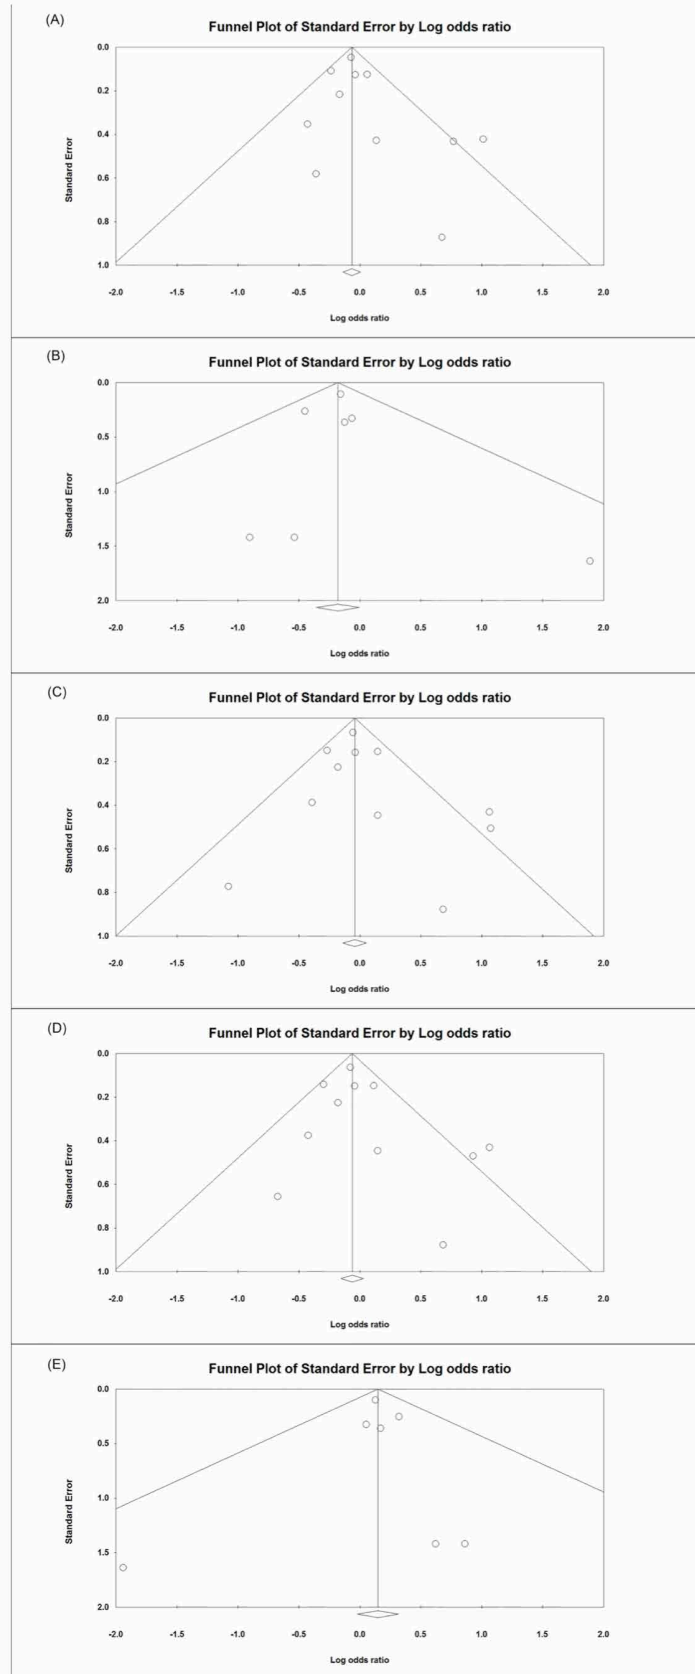

Figure S19. Assessment of publication bias shown with Funnel plots in studies assaying odds of TB associated with the MBL2 rs1800451 (A>C) gene polymorphism for overall analysis (Odds ratio against standard error in different genetic models. (A) C vs. A; (B) CC vs. AA; (C) CA vs. AA; (D) AA vs. CC+AC; (E) AA+AC vs. CC.

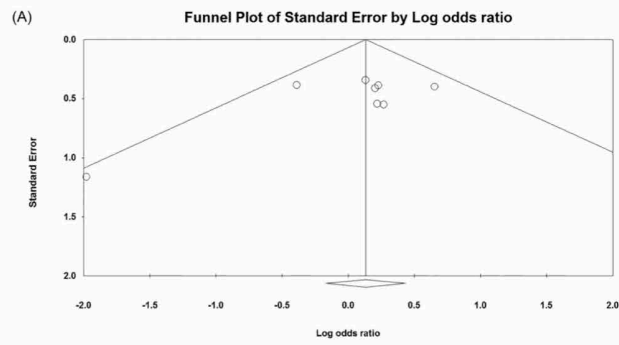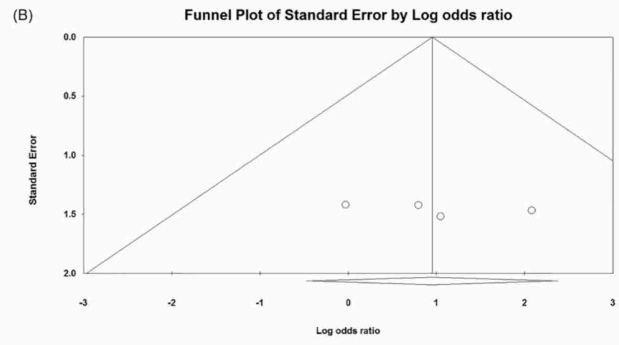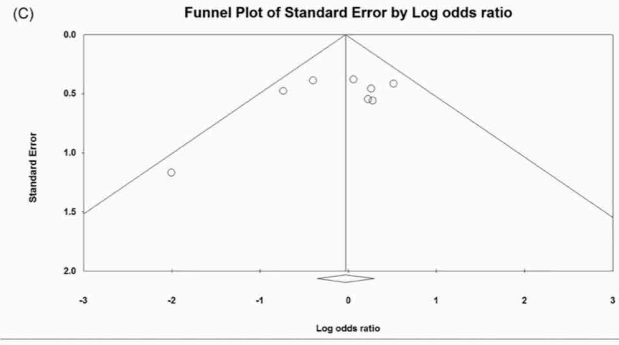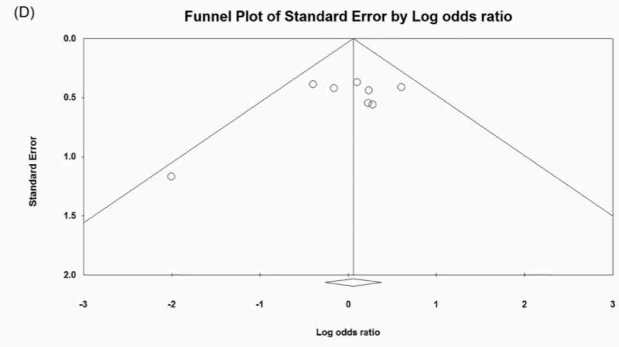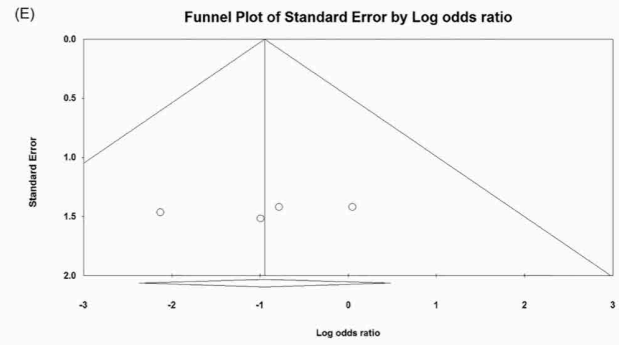

Figure SI10. Assessment of publication bias shown with Funnel plots in studies assaying odds of TB associated with the MBL2 rs5030737 (A>D) gene polymorphism for overall analysis (Odds ratio against standard error in different genetic models. (A) D vs. A; (B) DD vs. AA; (C) AD vs. AA; (D) AA vs. DD+AD; (E) AA+AD vs. DD.

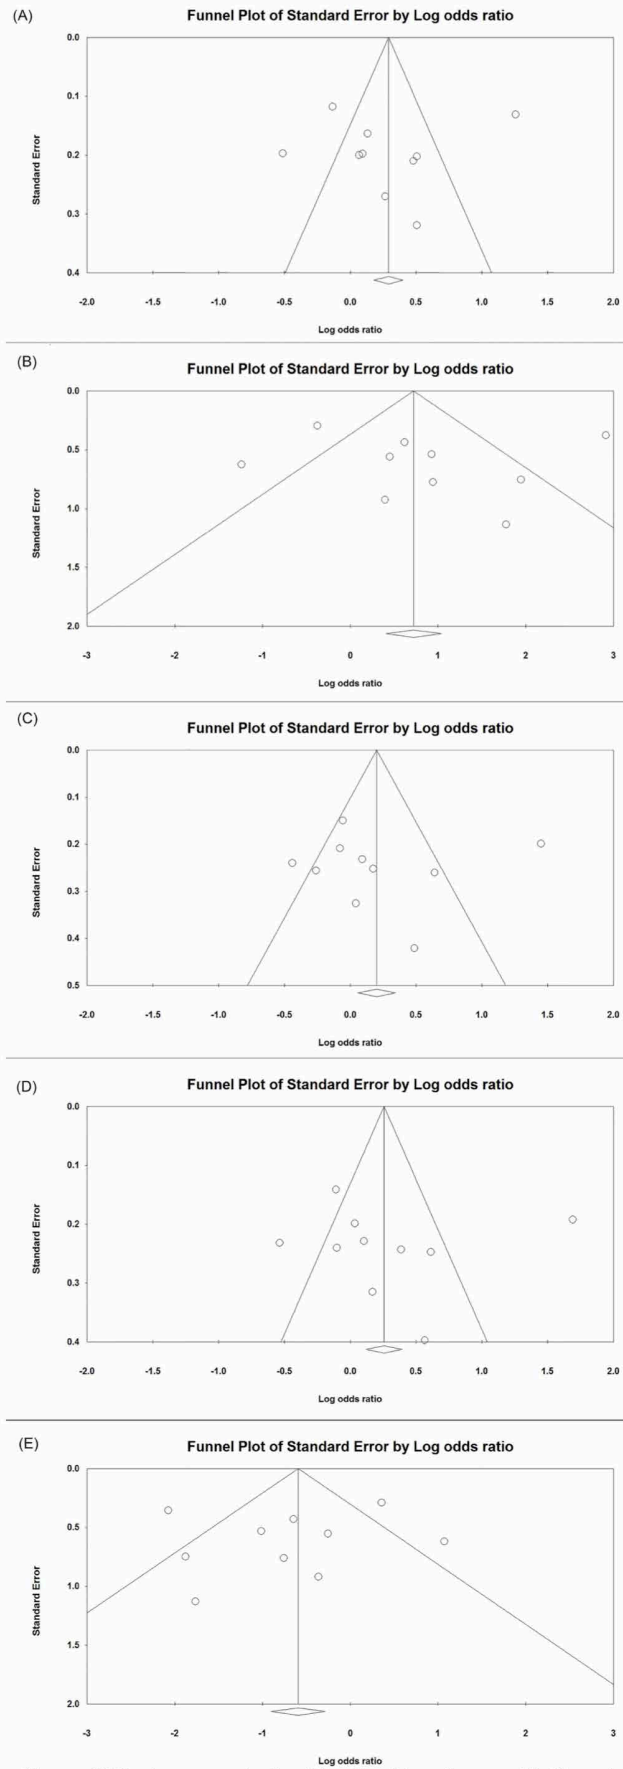

Figure SI11. Assessment of publication bias shown with Funnel plots in studies assaying odds of TB associated with the MBL2 combined rs1800450, rs1800451, 5030737 (A>O) exon 1 gene polymorphisms for overall analysis (Odds ratio against standard error in different genetic models. (A) O vs. A; (B) OO vs. AA; (C) AO vs. AA; (D) OO vs. AA+AO; (E) OO+AO vs. AA.

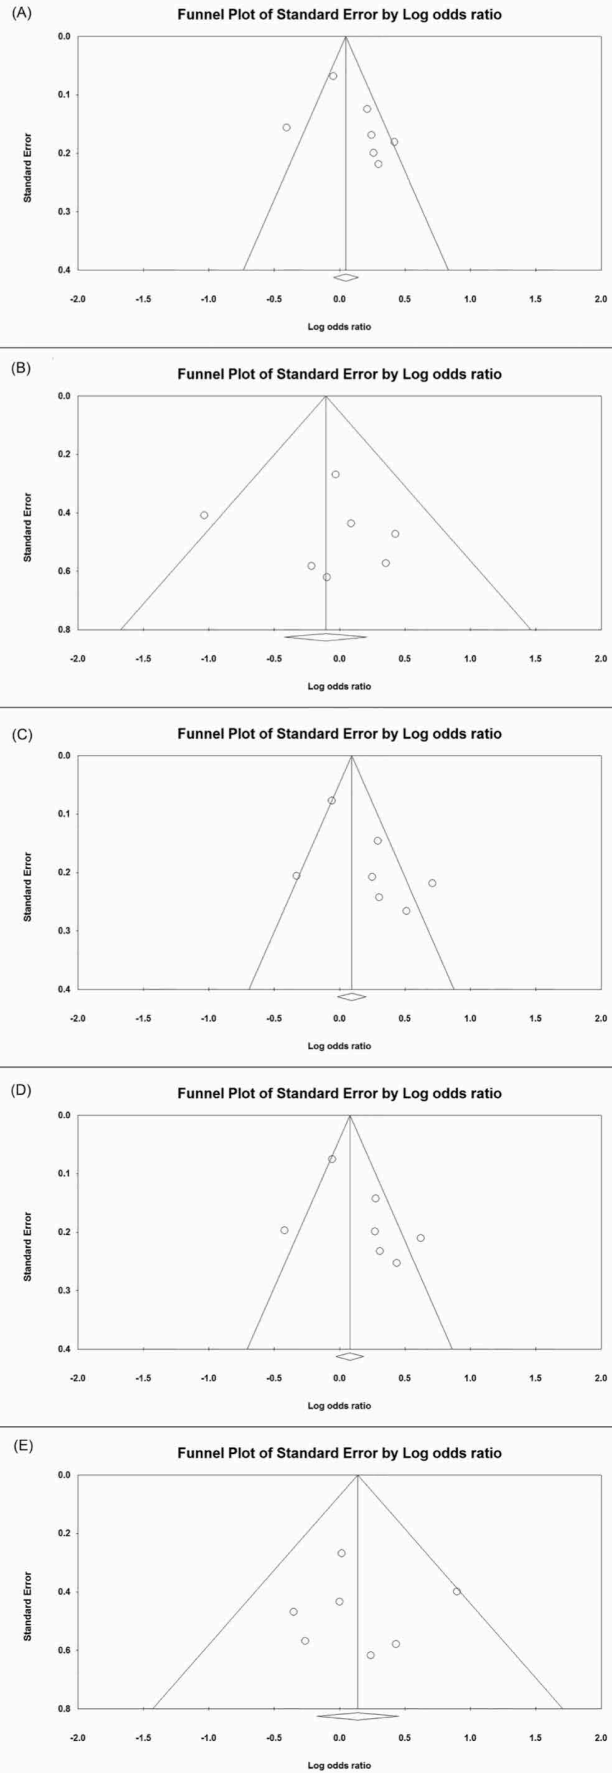

Figure SI12. Assessment of publication bias shown with Funnel plots in studies assaying odds of TB associated with the MBL2 rs7096206 (Y>X) gene polymorphism for overall analysis (Odds ratio against standard error in different genetic models. (A) X vs. Y; (B) XX vs. YY; (C) XY vs. XX; (D) YY vs. XX+XY; (E) YY+XY vs. XX.



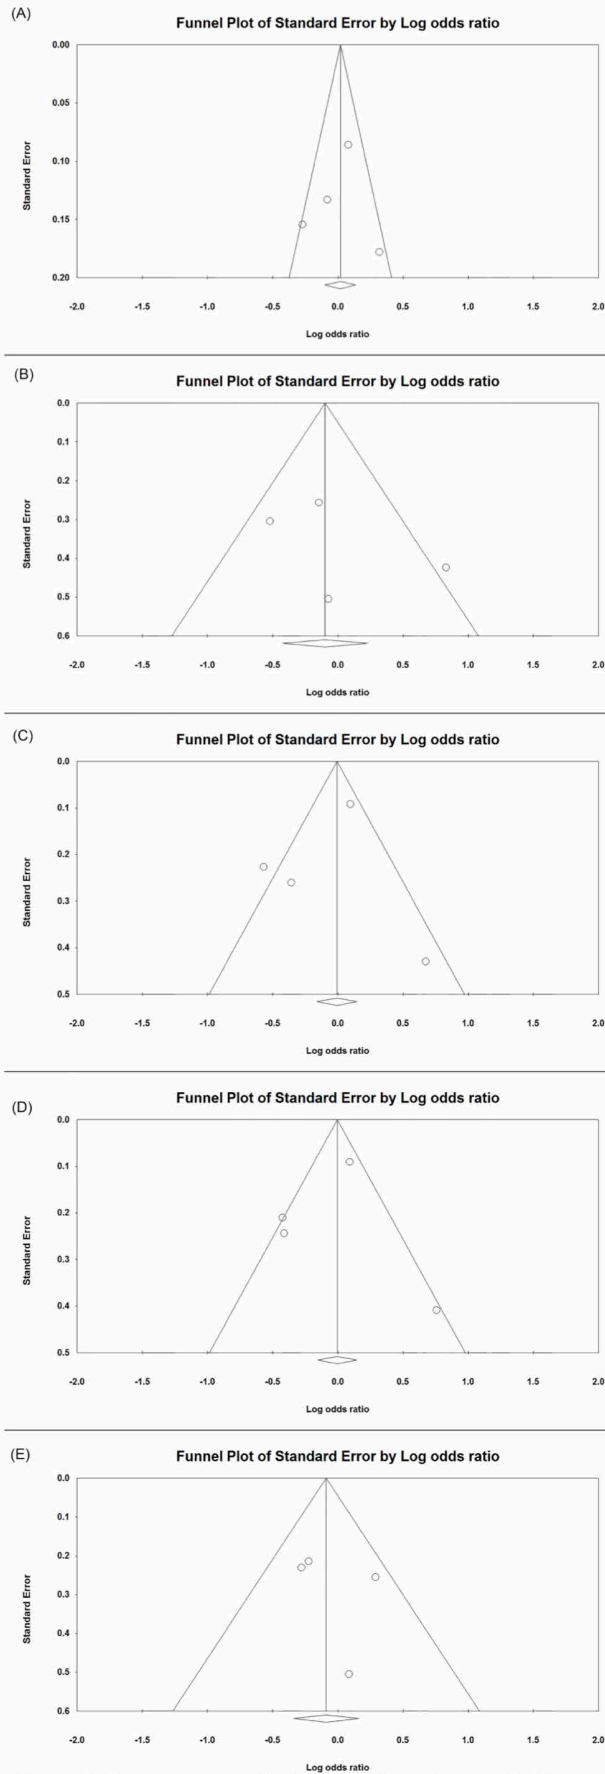

Figure SI13. Assessment of publication bias shown with Funnel plots in studies assaying odds of TB associated with the MBL2 rs11003125 (H>L) gene polymorphism for overall analysis (Odds ratio against standard error in different genetic models. (A) H vs. L; (B) HH vs. LL; (C) LH vs. LL; (D) HH vs. LL+LH; (E) HH+LH vs. LL.

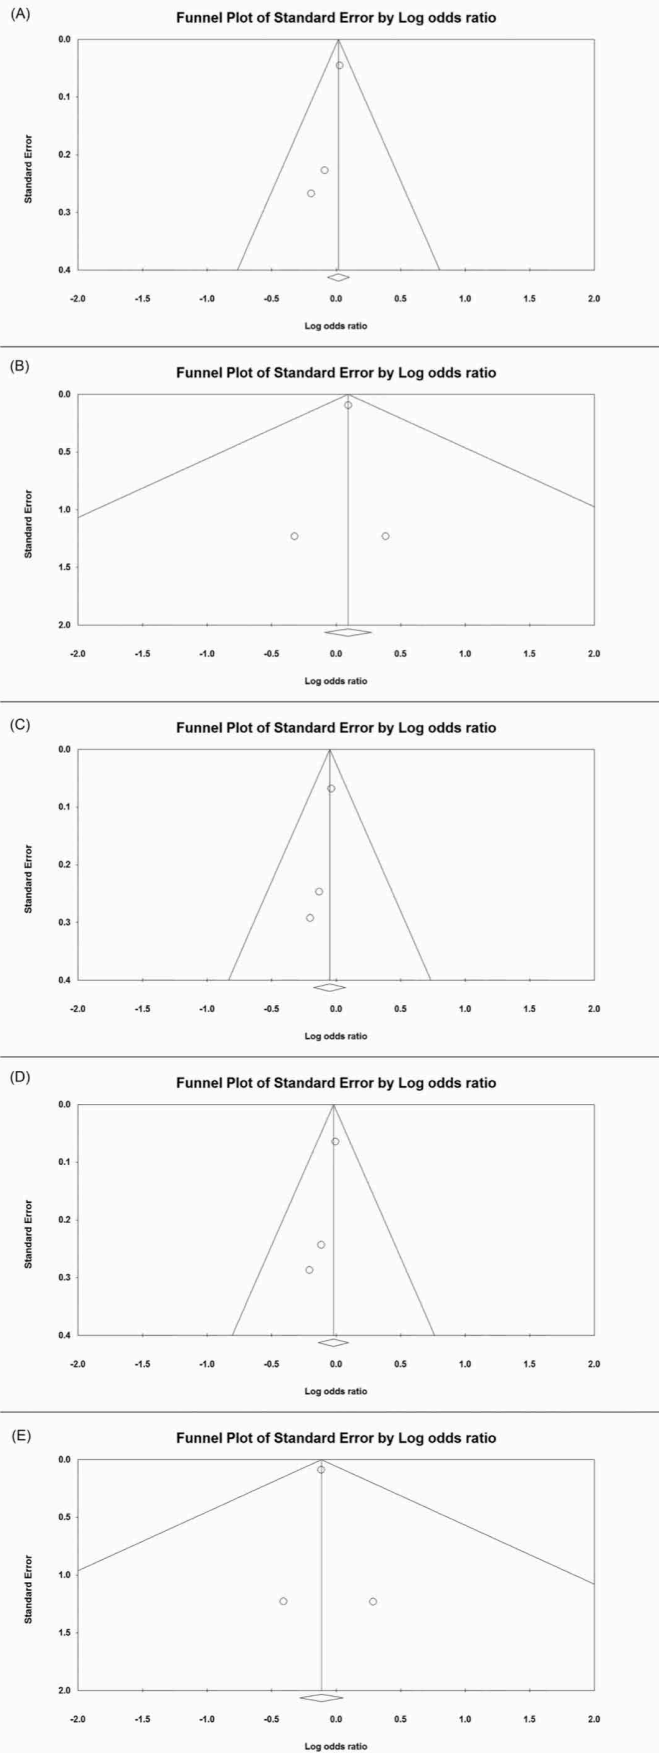

Figure SI14. Assessment of publication bias shown with Funnel plots in studies assaying odds of TB associated with the MBL2 rs7095891 ( $P>Q$ ) gene polymorphism for overall analysis (Odds ratio against standard error in different genetic models. (A) Q vs. P; (B) QQ vs. PP; (C) PQ vs. PP; (D) QQ vs. PP+PQ; (E) QQ+PQ vs. PP.

**Table ST1. Statistics to test publication bias and heterogeneity in the meta-analysis (rs1800450 African population)**

| Comparisons  | Egger's regression analysis |                         | Heterogeneity analysis |         | Model used for the meta-analysis |                            |           |
|--------------|-----------------------------|-------------------------|------------------------|---------|----------------------------------|----------------------------|-----------|
|              | Intercept                   | 95% Confidence Interval | p-value                | Q-value |                                  | $P_{\text{heterogeneity}}$ | $I^2$ (%) |
| B vs. A      | -0.40                       | -9.57 to 8.76           | 0.86                   | 5.59    | 0.13                             | 46.36                      | Fixed     |
| BB vs. AA    | 0.98                        | -141.43 to 143.40       | 0.94                   | 1.23    | 0.53                             | 0.001                      | Fixed     |
| AB vs. AA    | -0.13                       | -9.59 to 9.32           | 0.95                   | 5.64    | 0.13                             | 46.86                      | Fixed     |
| BB vs. AA+AB | 0.10                        | -136.71 to 136.92       | 0.99                   | 1.16    | 0.55                             | 0.001                      | Fixed     |
| BB+AB vs. AA | -0.30                       | -9.98 to 9.38           | 0.90                   | 5.90    | 0.11                             | 49.15                      | Fixed     |

**Table ST2. Statistics to test publication bias and heterogeneity in the meta-analysis (rs1800450 Asian population)**

| Comparisons  | Egger's regression analysis |                         |         | Heterogeneity analysis |                            |           | Model used for the meta-analysis |
|--------------|-----------------------------|-------------------------|---------|------------------------|----------------------------|-----------|----------------------------------|
|              | Intercept                   | 95% Confidence Interval | p-value | Q-value                | $P_{\text{heterogeneity}}$ | $I^2$ (%) |                                  |
| B vs. A      | 6.19                        | 2.74 to 9.64            | 0.01    | 14.8                   | 0.005                      | 73.05     | Random                           |
| BB vs. AA    | 3.48                        | -0.08 to 7.05           | 0.05    | 11.33                  | 0.023                      | 64.69     | Random                           |
| AB vs. AA    | 3.61                        | -2.03 to 9.26           | 0.13    | 5.96                   | 0.20                       | 32.96     | Fixed                            |
| BB vs. AA+AB | -3.16                       | -6.80 to 0.46           | 0.06    | 10.20                  | 0.03                       | 60.79     | Random                           |
| BB+AB vs. AA | 5.59                        | 0.92 to 10.26           | 0.03    | 9.94                   | 0.04                       | 59.79     | Random                           |

**Table ST3. Statistics to test publication bias and heterogeneity in the meta-analysis (rs1800451 African population)**

| Comparisons  | Egger's regression analysis |                         | Heterogeneity analysis |         | Model used for the meta-analysis |           |
|--------------|-----------------------------|-------------------------|------------------------|---------|----------------------------------|-----------|
|              | Intercept                   | 95% Confidence Interval | p-value                | Q-value |                                  | $I^2$ (%) |
| C vs. A      | 0.10                        | -1.88 to 2.09           | 0.88                   | 3.88    | 0.01                             | Fixed     |
| CC vs. AA    | -0.24                       | -3.57 to 3.07           | 0.77                   | 1.24    | 0.01                             | Fixed     |
| CA vs. AA    | 0.07                        | -2.27 to 2.42           | 0.93                   | 4.31    | 0.01                             | Fixed     |
| CC+CA vs. AA | 0.11                        | -2.27 to 2.50           | 0.90                   | 4.66    | 0.01                             | Fixed     |
| CC vs. AA+CA | 0.24                        | -1.94 to 2.42           | 0.67                   | 0.59    | 0.01                             | Fixed     |



**Table ST4. Statistics to test publication bias and heterogeneity in the meta-analysis (rs7096206 Asian population)**

| Comparisons  | Egger's regression analysis |                         |         | Heterogeneity analysis |                            |           | Model used for the meta-analysis |
|--------------|-----------------------------|-------------------------|---------|------------------------|----------------------------|-----------|----------------------------------|
|              | Intercept                   | 95% Confidence Interval | p-value | Q-value                | $P_{\text{heterogeneity}}$ | $I^2$ (%) |                                  |
| X vs. Y      | 1.80                        | -17.50 to 21.11         | 0.78    | 15.62                  | 0.004                      | 74.40     | Random                           |
| XX vs. YY    | 4.35                        | -9.31 to 18.01          | 0.38    | 7.24                   | 0.12                       | 44.81     | Fixed                            |
| XY vs. XX    | 0.12                        | -15.67 to 15.93         | 0.98    | 12.40                  | 0.01                       | 67.75     | Random                           |
| XY+XX vs. YY | 0.03                        | -17.78 to 17.84         | 0.99    | 14.57                  | 0.006                      | 72.55     | Random                           |
| XX vs. XY+YY | 3.21                        | -8.73 to 15.16          | 0.45    | 5.47                   | 0.24                       | 26.98     | Fixed                            |
